# Supplementary material for: High-entropy engineering with regulated defect structure and electron interaction tuning active sites for trifunctional electrocatalysis
Source: PubMed Central journal article supplement — Proc Natl Acad Sci U S A. 2024 Mar 18;121(13):e2313239121. doi: 10.1073/pnas.2313239121 (PMC10990096; doi:10.1073/pnas.2313239121), 2024-03-18
Supplement: pnas.2313239121.sapp.pdf [file pnas.2313239121.sapp.pdf]

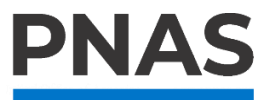

## Supporting Information for

### High-Entropy Engineering with Regulated Defect Structure and Electron Interaction Tuning Active Sites for Trifunctional Electrocatalysis

Xiaoxiao Zou<sup>a</sup>, Jiyang Xie<sup>a</sup>, Zhiyuan Mei<sup>a</sup>, Qi Jing<sup>a</sup>, Xuelin Sheng<sup>a</sup>, Conghui Zhang<sup>a</sup>, Yongxin Yang<sup>a</sup>, Mengjiao Sun<sup>a</sup>, Futong Ren<sup>a</sup>, Lilian Wang<sup>a</sup>, Tianwei He<sup>a,\*</sup>, Youchao Kong<sup>b,\*</sup>, Hong Guo<sup>a,c,\*</sup>

<sup>a</sup> School of Materials and Energy, International Joint Research Center for Advanced Energy Materials of Yunnan Province, Yunnan Key Laboratory of Carbon Neutrality and Green Low-carbon Technologies, Yunnan University, No. 2, Green Lake North Road, Kunming 650091, China

<sup>b</sup> Department of Physics and Electronic Engineering, Yancheng Teachers University, Yancheng 224002, China

<sup>c</sup> Southwest United Graduate School, Kunming 650091, China

\*To whom correspondence may be addressed.

**Email:**

guohong@ynu.edu.cn (H. G.); yb87816@um.edu.mo (Y. K.); he.tianwei@ynu.edu.cn (T. H.)

**This PDF file includes:**

Supporting Methods

Figures S1 to S17

Tables S1 to S9

Appendix

SI References

## Supporting Methods

### 1. Chemicals

All chemical reagents were purchased and used as received without any other purification unless otherwise stated. FeCl<sub>3</sub>, NiCl<sub>2</sub>, CoCl<sub>2</sub>, CuCl<sub>2</sub>, PtCl<sub>2</sub>(ACS Reagent Grad), potassium hydroxide (KOH, ≥90%), zinc acetate (Zn(C<sub>2</sub>H<sub>3</sub>O<sub>2</sub>)<sub>2</sub>, ≥99.5%), ethanol (99.8%), hydrochloric acid (HCl, 36%~38%), commercial Pt/C (20 wt%), and RuO<sub>2</sub> (99.95%) were obtained from Shanghai Titan Scientific Co., Ltd. Nafion solution (5 wt%) was bought from Sigma-Aldrich. Multi-walled carbon nanotubes (MWCNT) (product number TNM5) were purchased from Chengdu Organic Chemicals Co., China. High-purity O<sub>2</sub> (≥99.999%), and high-purity N<sub>2</sub> (≥99.999%), were obtained from Kunminutesg PENGYIDA Gas Products Co. Ltd. Deionized water was prepared by a laboratory water purification system in HHitech Master-S30UVF with a resistivity of 18.2 MΩ·cm at 25 °C was used throughout the experiments.

### 2. Experimental Section

2.1 The material with high metal loading (50%) is prepared according to the above method and named HHEN/CNT.

2.2 Similarly, a material without metal loading is prepared, named CNT.

### 3. Characterization.

3.1 Sample characterization.

Powder X-ray diffraction (XRD) was carried out by Rigaku SmartLab SE operated at 40 kV and 50 mA equipped with Cu-K $\alpha$  radiation with  $\lambda=1.5406$  Å. The morphology and microstructure of the as-synthesized samples were characterized through transmission electron microscopy (TEM; Talos F200X) and aberration-corrected TEM(AC-TEM) images, and energy dispersive spectroscopy (EDS) were taken on Thermofisher spectra 300, and electron energy loss spectroscopy (EELS) using a Gatan 1065. The elements' molar ratios of the samples were identified by inductively coupled plasma mass spectrometry (ICP-MS, Agilent 5110). Raman spectra were obtained by a HORIBA FRANCE SAS LABRAM HR EVO with the 532 nm excitation line of an Ar ion laser. The unpaired electrons in the atoms or molecules of the sample to see whether vacancy phenomena are produced by Electron Paramagnetic Resonance (EPR) (Bruker, EMXnano). The X-ray absorption fine structure (XAFS) spectroscopy was carried out using the RapidXAFS 1M (Anhui Absorption Spectroscopy Analysis Instrument Co., Ltd.) by transmission mode at 20 kV and 40 mA, and the Si (533) spherically bent crystal analyzer with a radius of curvature of 500 mm was used for Co, the Si (771) spherically bent crystal analyzer with a radius of curvature of 500 mm was used for Pt, the Si (553) spherically bent crystal analyzer with a radius of curvature of 500 mm was used for Cu, the Si (531) spherically bent crystal analyzer with a radius of curvature of 500 mm was used for Fe, the Si (551) spherically bent crystal analyzer with a radius of curvature of 500 mm was used for Ni. The raw XAFS data were calibrated and normalized using the software Demeter.

### 3.2 Electrochemical test.

Before depositing the electrocatalyst, the electrode was carefully washed and polished to remove all debris and dirt. 3 mg of electrocatalyst was dispersed in 1 mL hybrid solvent containing 0.9 mL water and ethanol mixed solution ( $V_{\text{water}}: V_{\text{ethanol}}=1;1$ ) and 0.1 mL 5wt% Nafion. The as-formed ink was ultrasonically dispersed for 1 h in an iced bath. The electrodes were prepared by dropping 20  $\mu\text{L}$  of catalyst ink on the rotation disk electrode (RDE, 5 mm in diameter with an exposed area of 0.196  $\text{cm}^2$ ) and drying under ambient conditions. Applying a three-electrode mode Ag/AgCl electrode saturated with KCl and carbon rod as a reference and counter electrode, respectively. The potential was calculated concerning the RHE, using the equation (S1):

$$E(\text{RHE}) = E(\text{Ag/AgCl}) + 0.0591 * \text{pH} + 0.197 \quad (\text{S1}).$$

The catalysts were coated onto the rotating disk electrode (RDE) tip serving as the working electrode. The LSV curves were carried at a scan rate of 10  $\text{mV s}^{-1}$  and a rotating speed of 1600 rpm. The Tafel slope was obtained by fitting the LSV using Equation (S2):

$$\eta = b (\log j) + a \quad (\text{S2}).$$

The overpotential was iR-corrected using Equation (S3):

$$E = E (\text{applied potential vs. RHE}) - IR \quad (\text{S3})$$

where  $I$  indicate the current, and  $R$  is the ohmic resistance of the electrolyte ( $\approx 5 \Omega$  for 1 M KOH,  $\approx 45 \Omega$  for 0.1 M KOH). LSV was performed using a CHI 730e electrochemical workstation and a Pine research instrument. The EIS was measured using an AMETEK PARSTAT3000A-DX electrochemical workstation with a frequency range from  $10^5$  to  $10^{-1}$  Hz in OCP with 5 mV sinusoidal perturbations. The commercial 20 wt% Pt/C was used as the electrode for ORR and HER. The commercial  $\text{RuO}_2$  was used as the electrode for OER. The stability was examined using the chronoamperometry method.

For ORR, the 50-cycle CV scan between 0.2 and 1.0 V vs. RHE at a scan speed of 100  $\text{mV s}^{-1}$  was performed to activate the electrocatalyst in an  $\text{O}_2$ -saturated 0.1 mol KOH solution. The rotating ring-disk electrode (RRDE) measurements were performed at the voltage range from 0.2 to 1.2 V versus RHE in  $\text{O}_2$ -saturated electrolyte at a rotation speed of 1600 rpm with a scan rate of 10  $\text{mV s}^{-1}$ . The electron transfer number ( $n$  values) and the  $\text{HO}_2^-$  formation yields can be calculated from the following equations:

$$n = 4 \times \frac{I_D}{(I_R / N + I_D)} \quad (\text{S4})$$

$$\text{HO}_2^- \% = 200 \times \frac{I_R}{I_D N + I_R} \quad (\text{S5})$$

where  $I_D$  is the disk current,  $I_R$  is the ring current, and  $N$  is the collection efficiency (0.37).

Before each OER measurement, the 50-cycle CV scan between 0.2 and 0.8 V vs. RHE at a scan speed of 100 mV s<sup>-1</sup> was performed to activate the electrocatalyst in an O<sub>2</sub>-saturated 0.1 mol KOH solution.

The OER Faradaic efficiency (FE) is investigated by the RRDE technique in an N<sub>2</sub>-saturated 1M KOH solution at a rotating speed of 1600 rpm. the FE was obtained according to

$$FE = I_{ring}/(C_e \times I_{disk}) \quad (S6)$$

Here,  $I_{disk}$  is the given current on the disk electrode.  $I_{ring}$  is the collection current on the Pt ring electrode at a constant potential of 0.4 V versus RHE.  $C_e$  is the oxygen collection coefficient (~0.37) for this type of electrode configuration.

For HER, the 50-cycle CV scan between 0 and -0.2V vs. RHE at a scan speed of 100 mV s<sup>-1</sup> was performed to activate the electrocatalyst in an N<sub>2</sub>-saturated 1M KOH.

The electrochemical active surface area (ECSA) was determined by comparing the double-layer capacitance ( $C_{dl}$ ) of the electrocatalysts, where the electrocatalysts with higher  $C_{dl}$  exhibit larger ECSA.  $C_{dl}$  was measured by cyclic voltammetry (CV) with a scan window between 1.00 and 1.05 V vs. RHE and a series of scan rates of 10, 20, 40, 60, 80, and 100 mV s<sup>-1</sup>. The linear fitting of the disk current density difference ( $\Delta j = (j_a - j_b)/2$ ) at 1.025 V vs RHE against the scan rates was subsequently performed.  $C_{dl}$  was the slope to reveal ECSA.

$$ECSA = C_{dl}/C_s \quad (S7)$$

where  $C_s$  is the specific capacitance value for a flat standard with 1 cm<sup>2</sup> of real surface area. The general value for  $C_s$  is between 20 ~60  $\mu\text{F cm}^{-2}$  Here we use 40  $\mu\text{F cm}^{-2}$  as the average value.

The mass activity (MA) and specific activity (SA) can be calculated from the following equations:

$$MA = j/m \quad (S8)$$

$$SA = MA/ECSA \quad (S9)$$

Where  $m$  is the loading mass of catalyst per geometrical area of the electrode.

The activity normalized by noble metal mass ( $MA_{Pt}$ ) using Equation:

$$MA_{Pt} = j/m_{Pt} \quad (S10)$$

Where  $m$  is the loading mass of Pt for catalyst per geometrical area of the electrode.

An aqueous Zn-air battery was assembled with homemade electrochemical cell frameworks. On the air electrode, the catalyst ink was uniformly coated onto carbon fiber paper at an

effective size of  $1.0 \times 1.0 \text{ cm}^2$  and then dried at room temperature. The catalyst loading per area was  $0.20 \text{ mg}\cdot\text{cm}^{-2}$  unless otherwise stated. A polished Zn plate was used as the anode with the same effective size. For comparison, the 20%Pt/C and RuO<sub>2</sub>-based Zn-air battery (using 20%Pt/C and RuO<sub>2</sub> as ORR and OER electrocatalysts, respectively, and their mass ratio is 1:1) was also assembled and evaluated. The electrolyte was composed of  $6 \text{ mol}\cdot\text{L}^{-1}$  KOH and  $0.2 \text{ mol}\cdot\text{L}^{-1}$  zinc acetate. The battery performance measurements were carried out under a constant current charging-discharging process by a NEWARE Battery Test System (CT-4008-5V50mA-164, Shenzhen, China) at room temperature.

Overall water splitting: A two-electrode system consisted of two carbon cloths loaded with catalysts as both the anode and cathode were conducted to measure water splitting performance. Two carbon cloths dispersed the catalysts ink onto carbon cloth with a loading of  $1.0 \text{ mg}\cdot\text{cm}^{-2}$  and dried to obtain a polarization working curve at a scan rate of  $10 \text{ mV s}^{-1}$  in 1M KOH electrolyte. For comparison, using 20%Pt/C and RuO<sub>2</sub> as HER and OER electrocatalysts, respectively.

#### 4. Theoretical simulations

Spin-polarized GGA calculations have been performed based on density functional theory (DFT), as implemented in the Vienna ab initio Simulation Package (VASP).<sup>[1-2]</sup> The Perdew-Burke-Ernzerhof (PBE) function within the generalized gradient approximation was used for the exchange-correlation energy.<sup>[3]</sup> To avoid the image interaction, the supercells  $\sim 12 \times 12 \times 20 \text{ \AA}^3$  HEANs slab, Monkhorst-Pack k-point grids of  $3 \times 3 \times 1$  respectively, were used during geometry optimization. The cutoff energy for the plan-wave basis was 500 eV. The coverage tolerances for energy and force were set to  $10^{-6}$  eV and  $0.02 \text{ eV/\AA}$ , respectively. Recently developed DFT-D3 method is adopted to include the interaction between the adsorbates and substrates.<sup>[4]</sup> The model construction of HEANs was determined by a high-throughput calculation with Python code. The slab for various reactions was cleaved through the miller index of (111), and the bottom two layers were fixed. The implicit solvation model of Mathew et al., named VASPsol was used<sup>[5]</sup>. For this model we have considered the solvent default parameter. The explicit water model was followed our previous work<sup>[6]</sup>.

##### 4.1 Oxygen Evolution Reaction and Oxygen Reduction Reaction

In case of OER, a complete process involves four concerted proton–electron transfer (CPET) reactions, the reactions in acid condition follow,

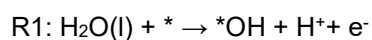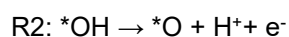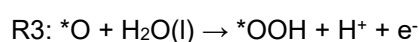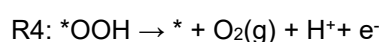

where \* represents the reaction site on the surface of catalysts; \*OH, \*O and \*OOH stand for the adsorbed intermediates during the reaction. In respect to ORR, it proceeds in a reversal way to that of OER.

In accordance to the equation  $\Delta G = \Delta E + \Delta E_{ZPE} - T\Delta S + \Delta G_U + \Delta G_{pH}$ , the free energy difference for elementary steps can be calculated. In this equation,  $\Delta E$  is the reaction energy defined as the energy difference of reactant and product molecules adsorbed on catalyst surface;  $\Delta E_{ZPE}$  and  $\Delta S$  are the changes of zero-point energy and entropy, respectively;  $\Delta G_U = -neU$  with  $U$  being the applied electrode potential and  $n$  the number of electrons transferred; and  $\Delta G_{pH} = -k_B T \ln[H^+]$  is the free energy correction of pH.

In this way, thus the free energy barrier for each elementary step can be calculated by

$$\Delta G_{R1} = \Delta G^{*OH}$$

$$\Delta G_{R2} = \Delta G^{*O} - \Delta G^{*OH}$$

$$\Delta G_{R3} = \Delta G^{*OOH} - \Delta G^{*O}$$

$$\Delta G_{R4} = 4.92 - \Delta G^{*OOH}$$

Here,  $\Delta G^{*OH}$ ,  $\Delta G^{*O}$  and  $\Delta G^{*OOH}$  are defined as,

$$\Delta G^{*OH} = \Delta G(H_2O + * \rightarrow *OH + H^+ + e^-)$$

$$\Delta G^{*O} = \Delta G(H_2O + * \rightarrow *O + 2H^+ + 2e^-)$$

$$\Delta G^{*OOH} = \Delta G(2H_2O + * \rightarrow *OOH + 3H^+ + 3e^-)$$

and the overpotential can be obtained through,

$$\eta_{OER} = \max(\Delta G_{Ri}), i = 1, 2, 3, 4/e - 1.23$$

$$\eta_{ORR} = \min(\Delta G_{Ri}), i = 1, 2, 3, 4/e + 1.23$$

## 4.2 Hydrogen Evolution Reaction

In simulation, the overall HER pathway can be described as <sup>[7-9]</sup>,

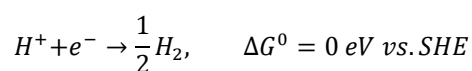

By setting the reference potential to be that of standard hydrogen electrode (SHE), the chemical potential (chemical potential per H) for the initial ( $H^+ + e^-$ ) and final ( $1/2H_2$ ) states are equal <sup>2</sup>. Hence, the Gibbs free energy of an intermediate adsorbed hydrogen ( $H^*$ ) is an important descriptor for the HER activity of electrocatalyst, and HER performance can be quantified by

the reaction Gibbs free energy of hydrogen adsorption ( $\Delta G_H$ ),

$$\Delta G_H = \Delta E_H + \Delta E_{ZPE} - T\Delta S.$$

where,  $\Delta E_H$  is the energy difference directly obtained by DFT calculations, which is defined as,

$$\Delta E_H = E[\text{slab} + H] - E[\text{slab}] - 1/2E[H_2]$$

where  $E[\text{slab} + H]$  and  $E[\text{slab}]$  represent the total energies of the catalyst adsorbed with and without H atom, respectively.  $E[H_2]$  is the energy of  $H_2$ .  $\Delta E_{ZPE} - T\Delta S$  is about 0.24 eV at 298.15K<sup>1</sup>, Then,  $\Delta G_H = \Delta E_H + 0.24$ .

### 4.3 Surface Pourbaix Diagrams

Surface Pourbaix diagrams reveal the surface states as the function of pH and potential, providing a thermodynamic indication of whether the catalyst will be poisoned. Considering HEANs pristine surface (Slab) with the adsorption site (\*) and the pre-adsorbed molecule ( $O_mH_n^*$ ), the adsorption

equation can be written as:

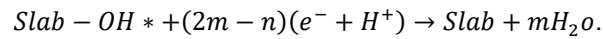

where m and n are, respectively, the number of oxygen and hydrogen atoms of the adsorbate. The free energy changes were calculated using:

$$\Delta G = G_{\text{slab}} + mG_{H_2O} + G_{\text{slab}-OH^*} - (2m - n)(0.5G_{H_2} - U_{SHE} - 0.00591\text{pH})$$

where  $U_{SHE}$  is the potential relative to the standard hydrogen electrode (SHE).

## Supporting Figures.

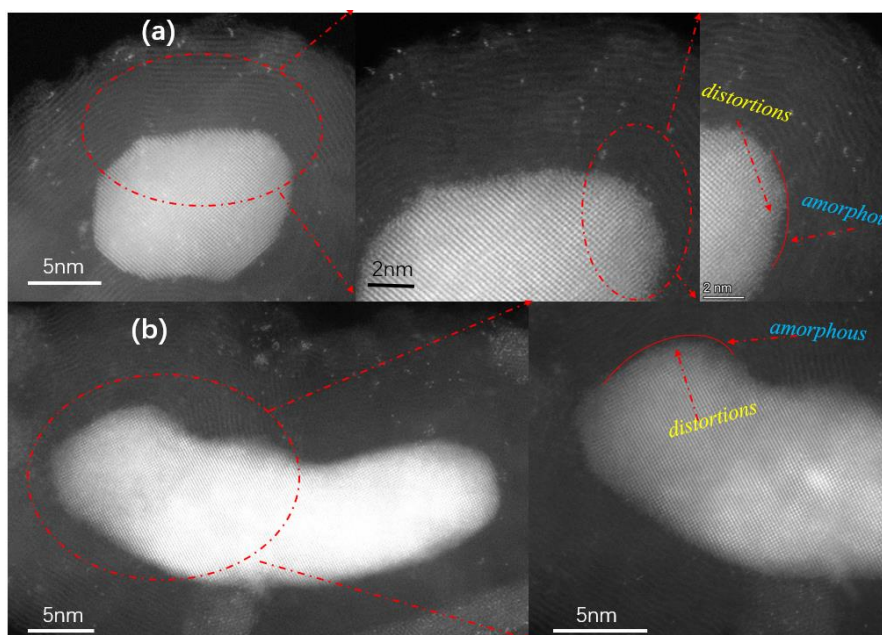

**Fig. S1.** AC-HAADF-STEM images of metal-C interface interaction for HEAN/CNT.

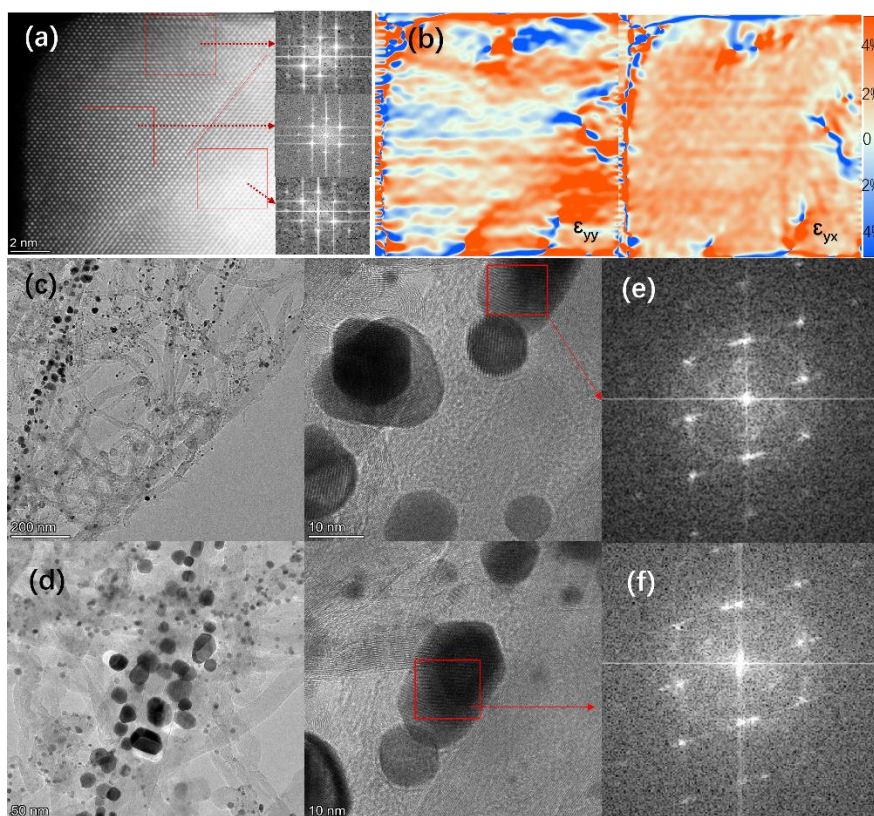

**Fig. S2.** (a) AC-STEM and the FFT patterns of the relevant parts and (b) GPA images of HEAN/CNT for axial strain ( $\epsilon_{yy}$ ) and shear strain ( $\epsilon_{yx}$ ). (c and d) HRTEM images of Pt/CNT, (e and f) the FFT patterns of the relevant parts.



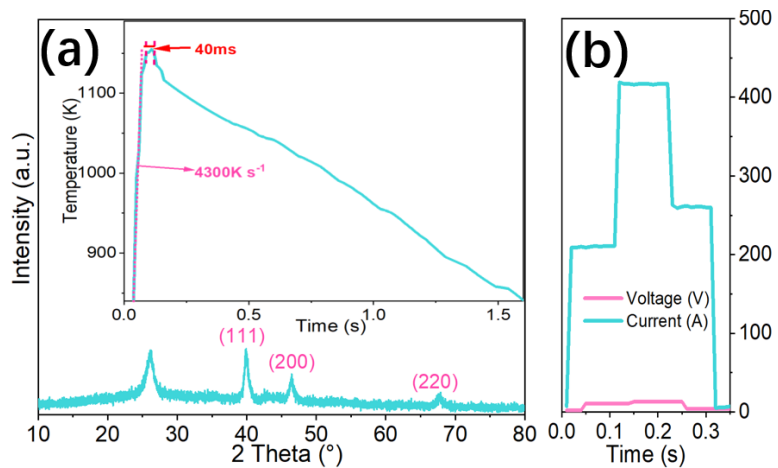

**Fig. S3.** (a) XRD and the insert picture is preparation temperature (b) the related current and voltage curves of HEAN/CNT.

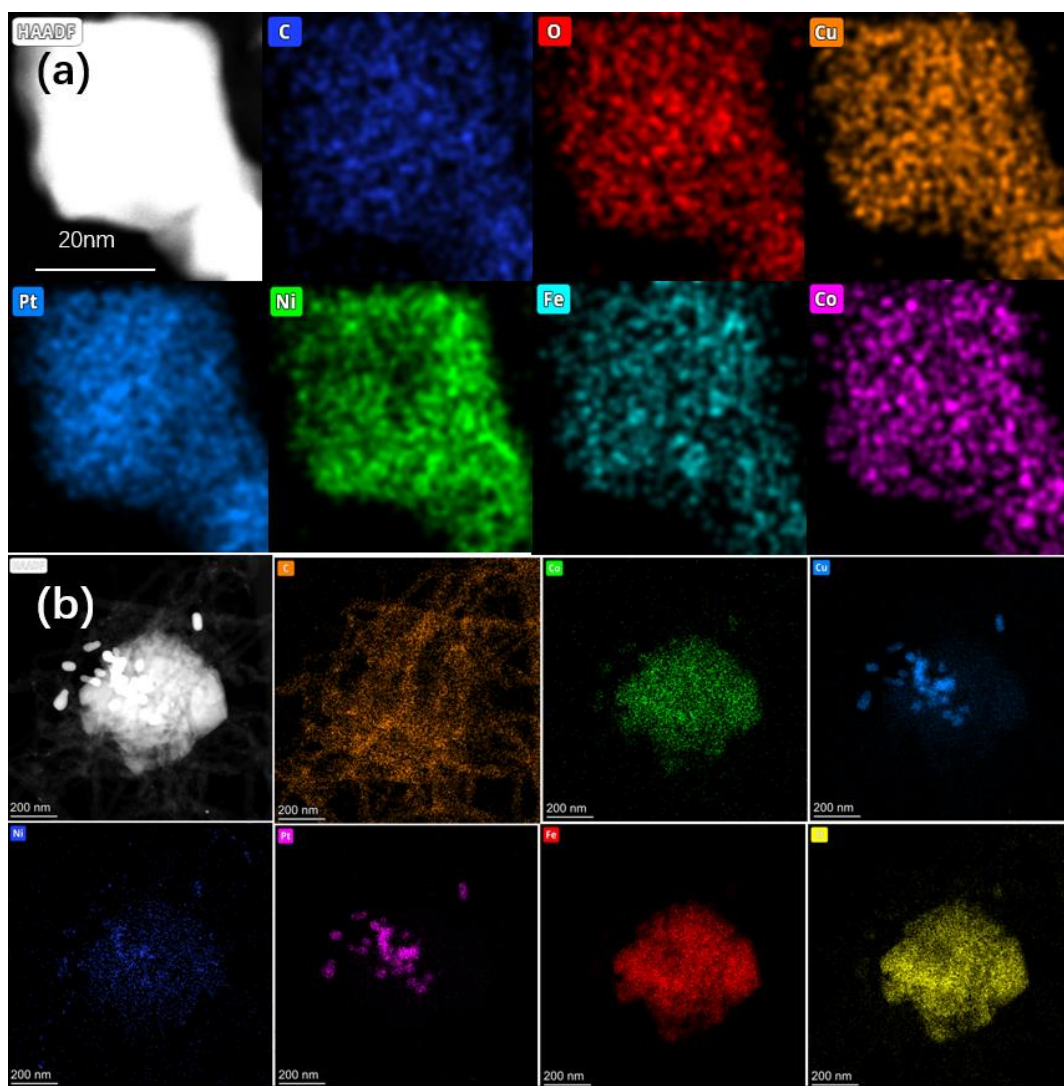

**Fig. S4.** (a) AC-HAADF and EDS maps for HEAN/CNT, (b) HAADF image and EDS maps of IFHEAN/CNT.

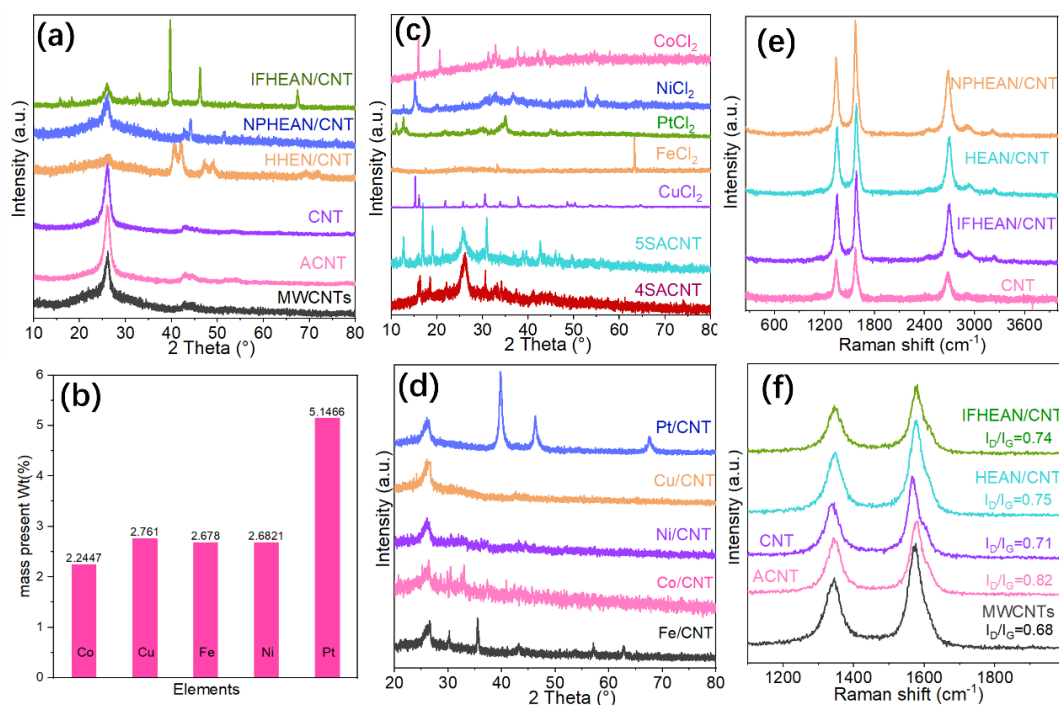

**Fig. S5.** (a) XRD of different samples, (b) ICP-MS of HEAN/CNT, (c and d) XRD of samples in the preparation process and single metal samples, (e and f) Raman spectra of different samples.

The test results of Raman (**Fig. S5e**) show that no metal oxide peaks were captured, which could also explain the metallic properties of the nanoparticles formed. The carbon structure was analyzed in **Fig. S5f**. Two peaks located at  $1340\text{ cm}^{-1}$  and  $1580\text{ cm}^{-1}$  are assigned to typical D and G bands of carbon, which correspond to the defects and graphitization degree of carbon materials, respectively. The high intensity of the G band represents a high graphitization degree, which is favorable to the electronic conductivity. The high  $I_D/I_G$  value indicates more defect numbers in the carbon frameworks offering more catalytic reaction active sites.

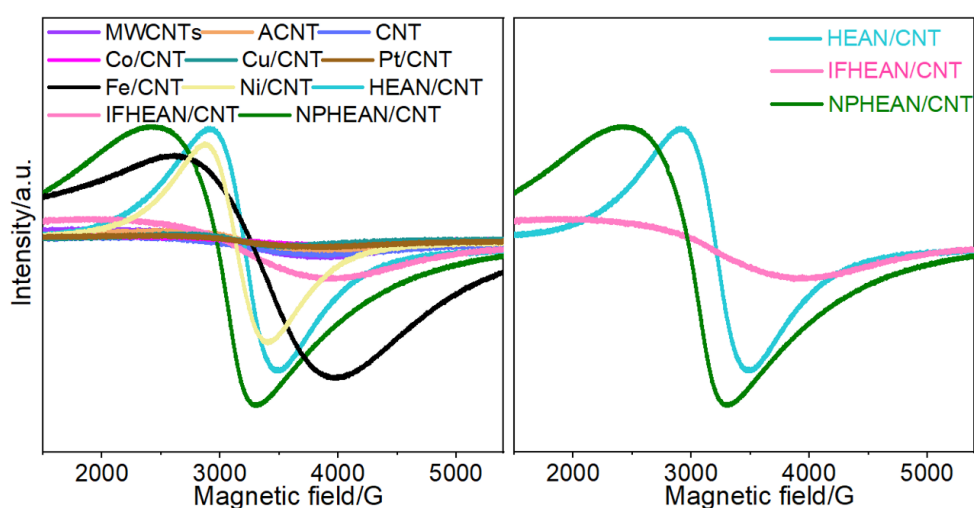

**Fig. S6.** EPR signals of different samples.

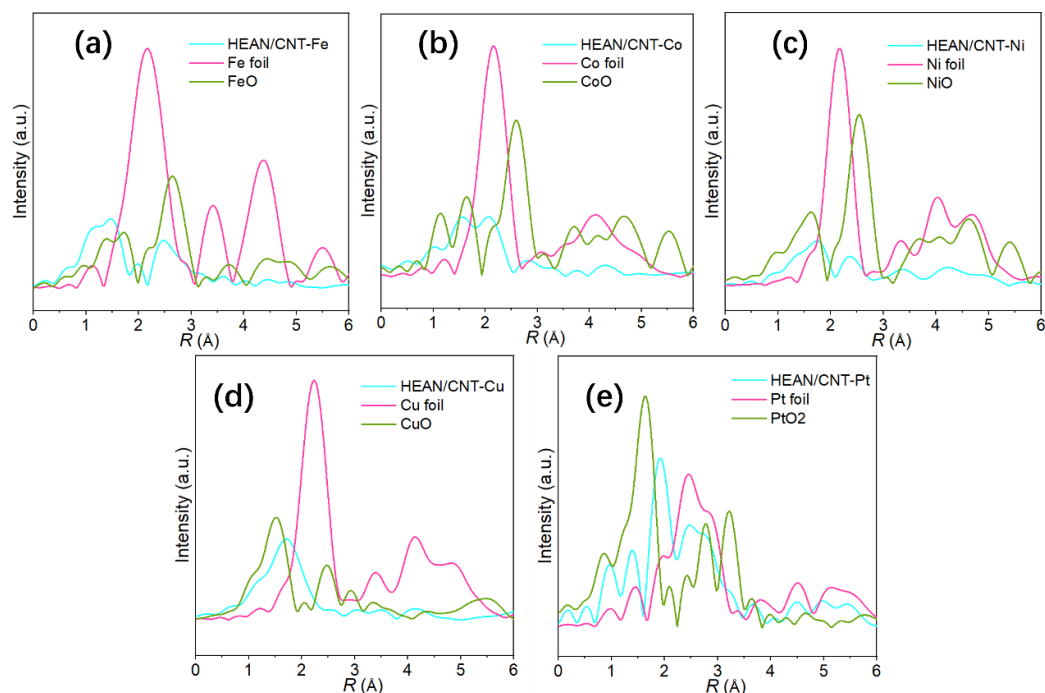

**Fig. S7.** (a-e) the  $k^3$ -weighted Fourier transform spectra from EXAFS.

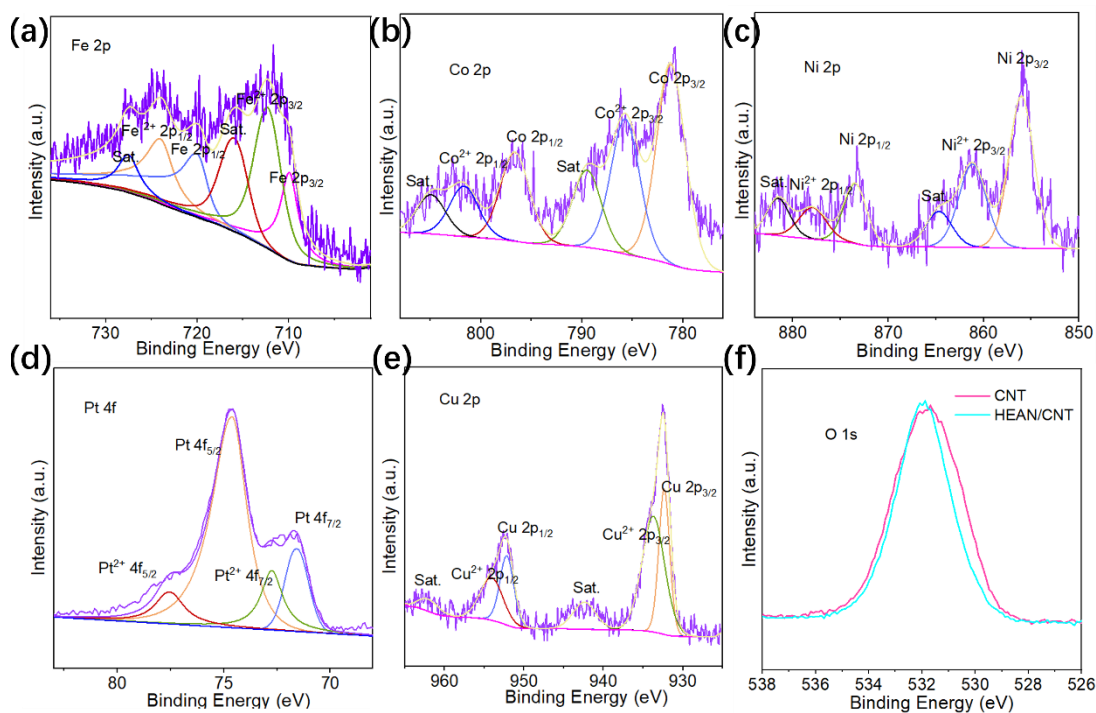

**Fig. S8.** XPS analysis of HEAN/CNT for (a) Fe 2p spectrum. (b) Co 2p spectrum. (c) Ni 2p spectrum. (d) Pt 4f spectrum. (e) Cu 2p spectrum. (f) O1s spectrum of HEAN/CNT and CNT.

Due to the inevitable exposure to air during the preparation process before XPS measurements results in the oxidation of the catalyst surface. Since XPS only detects the surface composition of the catalyst, metal oxides are observed in the XPS spectra.

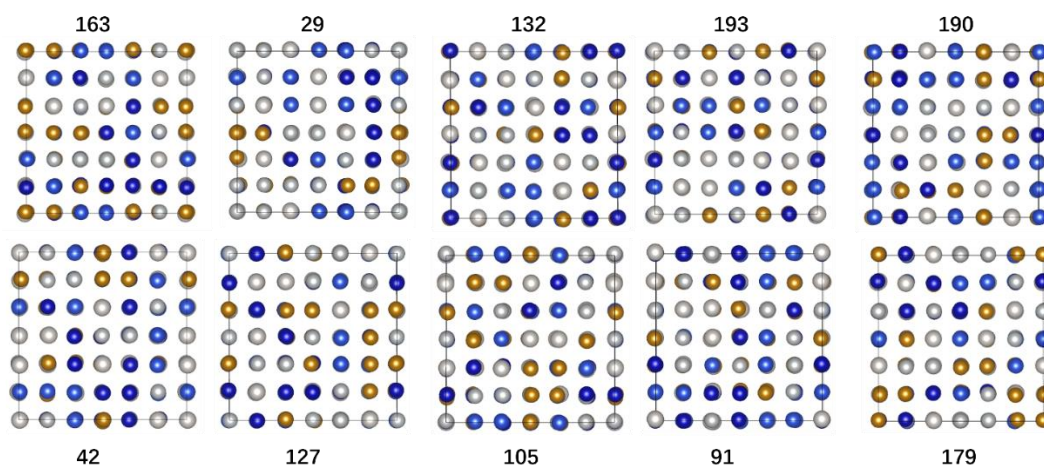

**Fig. S9.** Top views of ten optimized structures with low energy.

So far, the model construction of high-entropy materials is still a difficult task. Therefore, to be fully considered, we use high-throughput calculations to find the ground states. In our work, for the model construction and selection of HEANs, we employed Python code embedded in the Atomic Simulation Environment (ASE), which is an ASE written in the Python programming language with the aim of setting up, steering, and analyzing atomistic simulations, to construct the HEANs models. Firstly, we randomly replaced platinum with Fe, Co, Ni, and Cu to form 250 HEANs stochastic structures for first-step optimization calculations. The energies of the 250 HEANs are listed in **Table S2**. We then selected the 10 structures with the lowest energies among the 250 structures for the next step high-precision optimization (**Fig. S9**). Finally, after high precision optimization, the No.179 with the lowest energy was selected as a candidate for the following calculations (**Fig. 3g**).

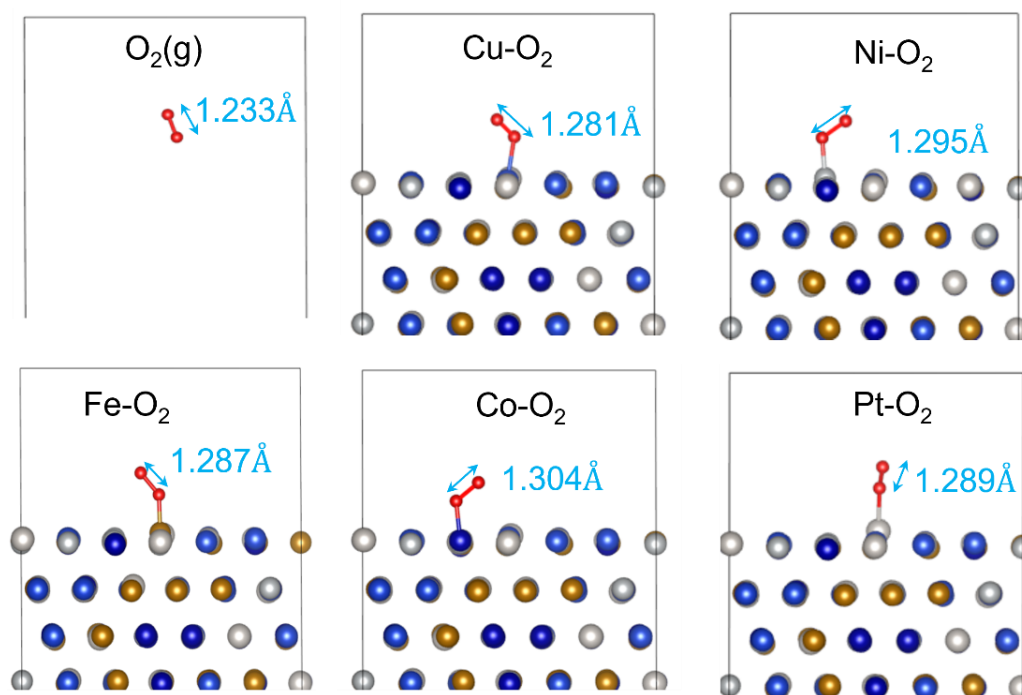

**Fig. S10.** Optimized structure of  $O_2$  adsorbed on active sites of HEANs.

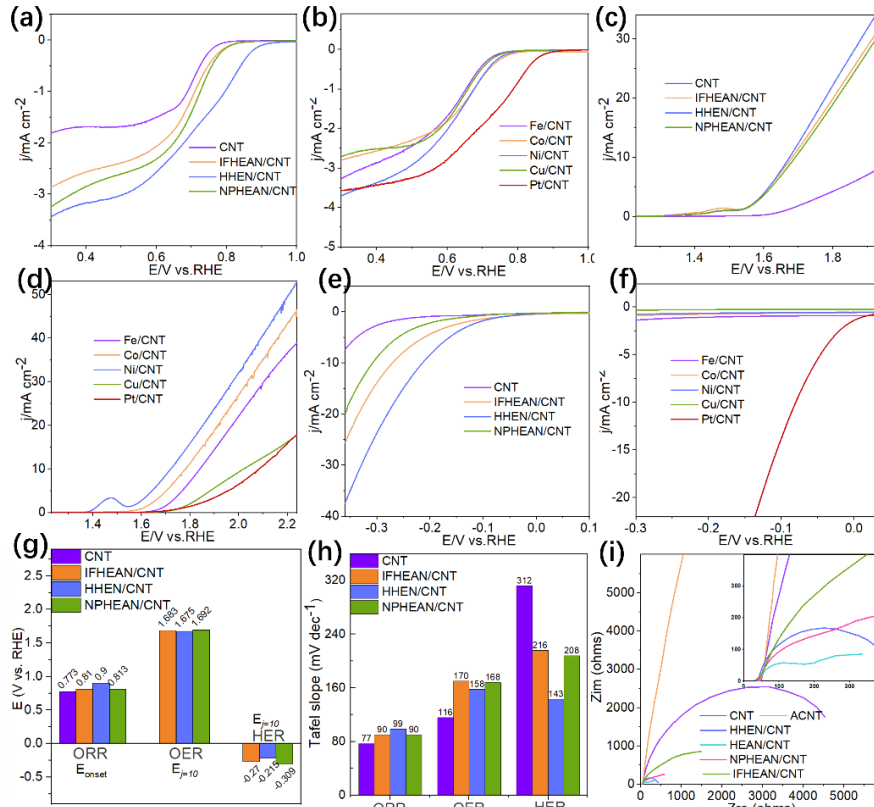

**Fig. S11.** (a and b) ORR, (c and d) OER and (e and f) HER polarization LSV curves, (g) overpotential, (h) Tafel plots and (i) EIS for different samples.

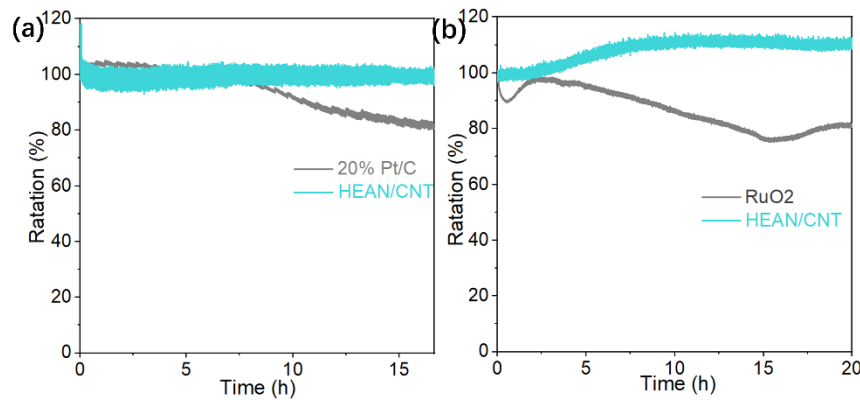

**Fig. S12.** (a and b) ORR and OER stability test for HEAN/CNT and commercial catalyst.

The long-term stability of the material was also tested by the chronoamperometry method, as shown in **Fig. S12a**, there was no significant attenuation of the HEAN/CNT during the cycle of up to 16 hours, but the 20% Pt/C began to gradually decay after 6h. It can also be seen in **Fig. S12b** that the retention rate of HEAN/CNT has not decayed during the test for up to 20h, but has been more increased and more stable and has been maintained at 110%, but RuO<sub>2</sub> is almost unstable and has been attenuated in the test, demonstrating the excellent stability of the high-entropy material. It also proves the stability brought by the hysteric diffusion effect.

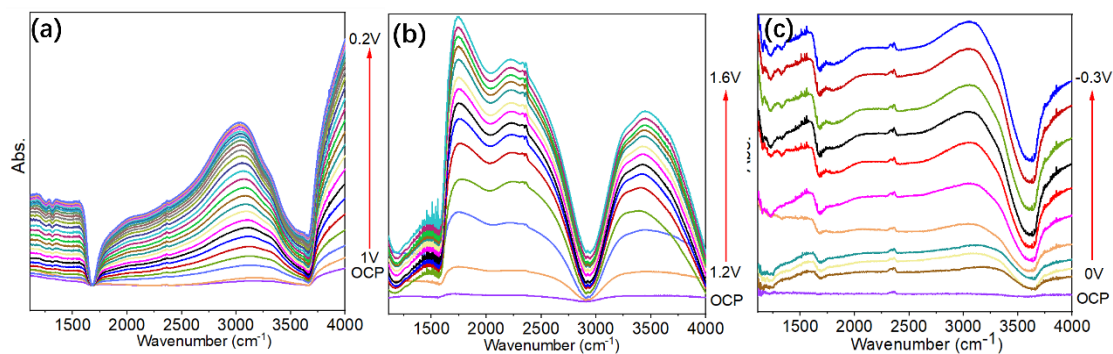

**Fig. S13.** (a, b and c) in-situ FTIR spectra of HEN for the ORR, OER and HER.

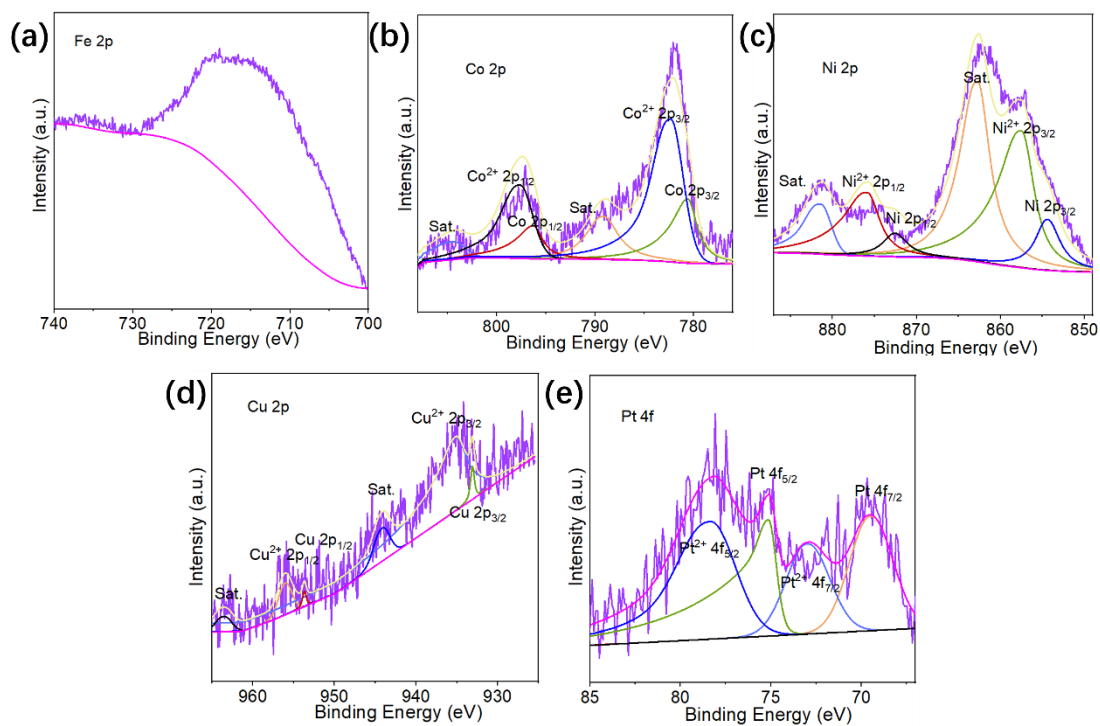

**Fig. S14.** XPS for OER-catalyzed HEAN/CNT.

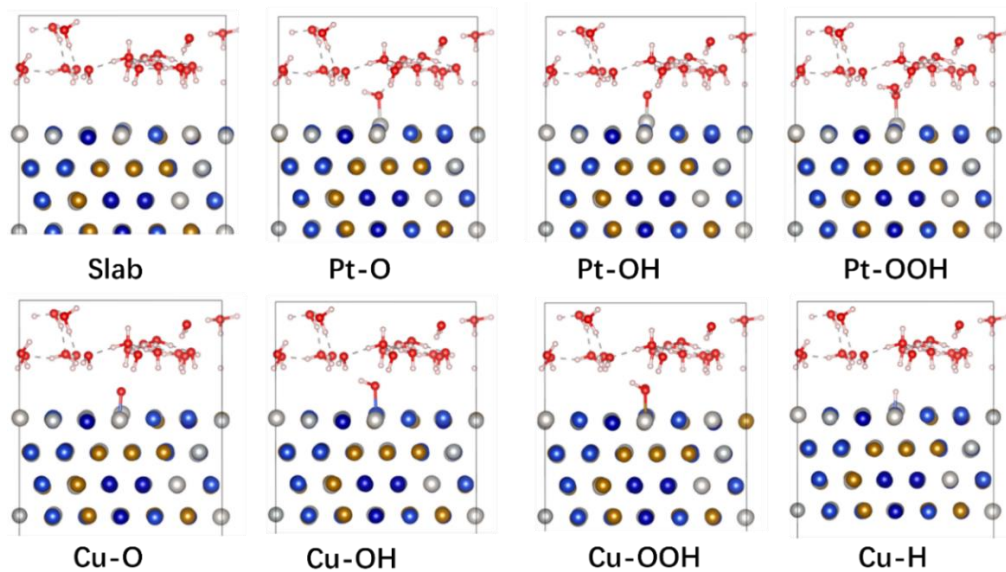

Fig. S15. Various intermediates on active site in explicit solvation.

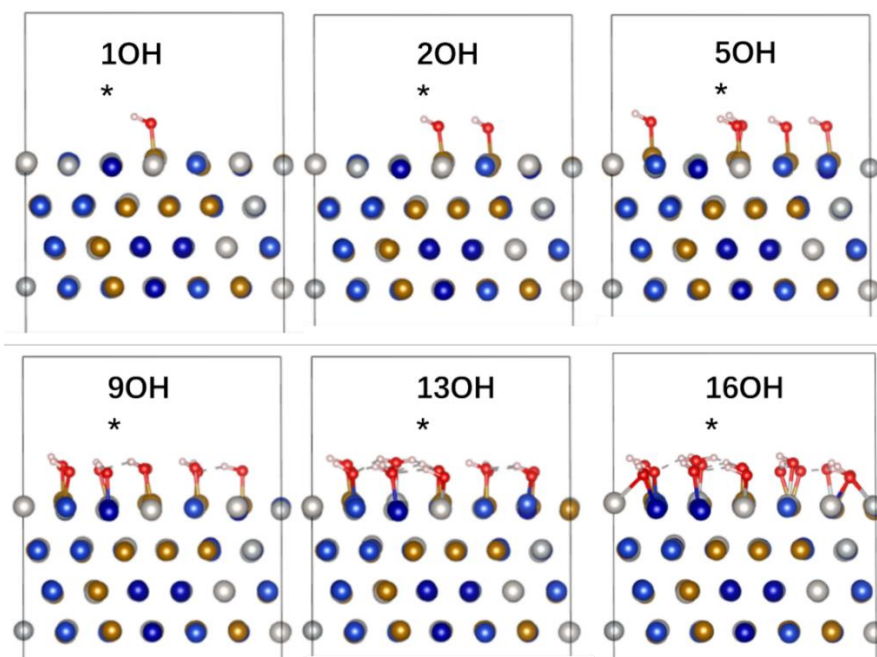

Fig. S16. Optimized OH<sup>-</sup> covered surface of HEANs.

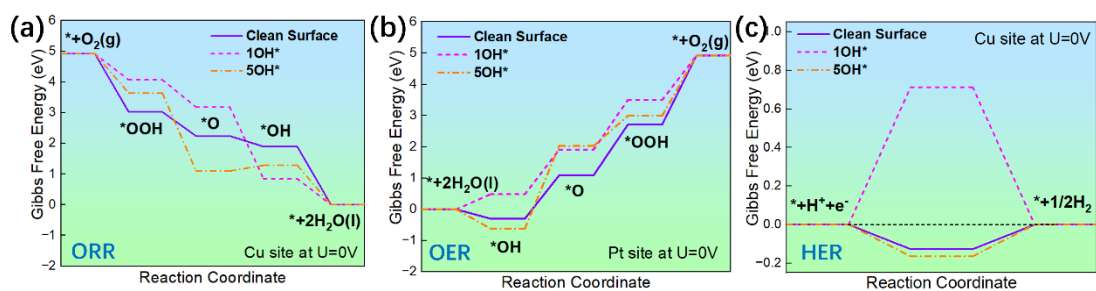

Fig. S17. Gibbs free energy of ORR, OER, and HER on OH<sup>-</sup> covered surface.

## Supporting Tables.

**Table S1.** The content of different elements for EDS maps

| Z  | Element | Family | Atomic Fraction (%) | Atomic Error (%) | Mass Fraction (%) | Mass Error (%) | Fit Error (%) |
|----|---------|--------|---------------------|------------------|-------------------|----------------|---------------|
| 6  | C       | K      | 63.30               | 1.62             | 15.88             | 1.13           | 1.76          |
| 8  | O       | K      | 6.24                | 1.18             | 2.08              | 0.43           | 1.16          |
| 26 | Fe      | K      | 4.66                | 0.35             | 10.11             | 0.46           | 0.61          |
| 27 | Co      | K      | 3.00                | 0.13             | 9.22              | 0.18           | 1.68          |
| 28 | Ni      | K      | 8.45                | 1.16             | 10.36             | 1.54           | 0.34          |
| 29 | Cu      | K      | 4.70                | 0.38             | 11.59             | 0.56           | 0.90          |
| 78 | Pt      | L      | 9.65                | 1.44             | 40.76             | 2.69           | 0.14          |

**Table S2.** DFT energies for different HEANs structures

| DFT energy | POSCAR Number |
|------------|---------------|------------|---------------|------------|---------------|------------|---------------|
| -707.89    | 179           | -705.908   | 49            | -705.128   | 81            | -704.08    | 173           |
| -707.561   | 193           | -705.856   | 106           | -705.124   | 67            | -704.078   | 18            |
| -707.346   | 91            | -705.845   | 160           | -705.12    | 40            | -704.017   | 95            |
| -707.124   | 105           | -705.833   | 68            | -705.119   | 175           | -703.989   | 96            |
| -707.029   | 42            | -705.832   | 89            | -705.106   | 151           | -703.955   | 114           |
| -706.947   | 190           | -705.827   | 180           | -705.102   | 167           | -703.834   | 123           |
| -706.943   | 127           | -705.801   | 247           | -705.089   | 138           | -703.812   | 154           |
| -706.94    | 132           | -705.799   | 39            | -705.064   | 189           | -703.796   | 59            |
| -706.875   | 29            | -705.798   | 94            | -705.063   | 199           | -703.695   | 235           |
| -706.72    | 163           | -705.794   | 142           | -705.058   | 213           | -703.669   | 87            |
| -706.701   | 77            | -705.789   | 153           | -705.05    | 136           | -703.655   | 222           |
| -706.643   | 33            | -705.765   | 75            | -704.987   | 166           | -703.543   | 120           |
| -706.616   | 30            | -705.752   | 171           | -704.98    | 32            | -703.451   | 5             |
| -706.59    | 225           | -705.748   | 112           | -704.975   | 66            | -703.42    | 207           |
| -706.583   | 125           | -705.73    | 22            | -704.953   | 60            | -703.379   | 224           |
| -706.563   | 28            | -705.722   | 64            | -704.908   | 203           | -703.211   | 218           |
| -706.532   | 220           | -705.721   | 165           | -704.883   | 41            | -703.112   | 214           |
| -706.502   | 102           | -705.717   | 168           | -704.865   | 156           | -703.057   | 215           |
| -706.484   | 135           | -705.693   | 2             | -704.845   | 141           | -703.057   | 249           |
| -706.484   | 113           | -705.692   | 185           | -704.844   | 181           | -702.915   | 221           |
| -706.468   | 157           | -705.684   | 80            | -704.805   | 21            | -702.717   | 250           |



|          |     |          |     |          |     |          |     |
|----------|-----|----------|-----|----------|-----|----------|-----|
| -706.435 | 46  | -705.678 | 56  | -704.805 | 92  | -702.442 | 223 |
| -706.425 | 137 | -705.668 | 101 | -704.803 | 186 | -702.366 | 236 |
| -706.396 | 63  | -705.667 | 129 | -704.778 | 9   | -702.09  | 243 |
| -706.388 | 16  | -705.651 | 161 | -704.778 | 35  | -702.071 | 237 |
| -706.379 | 37  | -705.645 | 198 | -704.771 | 26  | -702.07  | 238 |
| -706.376 | 85  | -705.644 | 58  | -704.759 | 83  | -702.046 | 231 |
| -706.336 | 131 | -705.639 | 147 | -704.739 | 1   | -701.94  | 242 |
| -706.313 | 71  | -705.633 | 79  | -704.736 | 194 | -701.809 | 233 |
| -706.298 | 150 | -705.626 | 107 | -704.692 | 122 | -701.807 | 208 |
| -706.215 | 14  | -705.618 | 155 | -704.691 | 55  | -701.693 | 204 |
| -706.188 | 246 | -705.599 | 110 | -704.684 | 162 | -701.41  | 227 |
| -706.152 | 57  | -705.586 | 27  | -704.683 | 104 | -701.092 | 240 |
| -706.138 | 90  | -705.583 | 109 | -704.674 | 93  | -701.072 | 239 |
| -706.129 | 133 | -705.576 | 10  | -704.662 | 73  | -700.975 | 212 |
| -706.127 | 69  | -705.558 | 191 | -704.65  | 99  | -700.862 | 248 |
| -706.125 | 44  | -705.554 | 11  | -704.637 | 117 | -700.823 | 202 |
| -706.113 | 36  | -705.552 | 15  | -704.633 | 228 | -700.666 | 234 |
| -706.098 | 146 | -705.551 | 84  | -704.627 | 188 | -700.594 | 219 |
| -706.089 | 124 | -705.547 | 195 | -704.625 | 7   | -700.303 | 216 |
| -706.065 | 121 | -705.543 | 24  | -704.623 | 174 | -700.203 | 229 |
| -706.055 | 25  | -705.535 | 177 | -704.618 | 17  | -699.799 | 241 |
| -706.042 | 43  | -705.534 | 52  | -704.603 | 119 | -699.662 | 226 |
| -706.041 | 6   | -705.532 | 140 | -704.56  | 53  | -698.101 | 201 |
| -705.998 | 152 | -705.521 | 158 | -704.556 | 115 | -697.479 | 210 |
| -705.985 | 82  | -705.515 | 139 | -704.545 | 70  | -696.39  | 232 |
| -705.959 | 116 | -705.498 | 184 | -704.538 | 196 | -694.251 | 217 |
| -705.955 | 19  | -705.492 | 103 | -704.521 | 169 | -693.354 | 245 |
| -705.953 | 86  | -705.492 | 149 | -704.495 | 144 | -705.197 | 206 |
| -705.935 | 118 | -705.48  | 8   | -704.488 | 192 | -705.191 | 74  |
| -705.923 | 230 | -705.475 | 3   | -704.473 | 48  | -705.178 | 178 |
| -705.912 | 76  | -705.468 | 183 | -704.466 | 148 | -705.176 | 13  |
| -705.326 | 143 | -705.467 | 4   | -704.422 | 130 | -705.169 | 47  |
| -705.29  | 159 | -705.464 | 100 | -704.395 | 97  | -705.161 | 128 |
| -705.289 | 51  | -705.435 | 72  | -704.393 | 108 | -705.158 | 0   |
| -705.277 | 176 | -705.429 | 134 | -704.353 | 65  | -705.156 | 172 |
| -705.256 | 23  | -705.422 | 145 | -704.352 | 187 | -705.151 | 98  |
| -705.254 | 78  | -705.401 | 54  | -704.303 | 209 | -705.139 | 62  |
| -705.248 | 205 | -705.381 | 197 | -704.283 | 170 | -705.33  | 31  |
| -705.241 | 61  | -705.372 | 45  | -704.283 | 20  | -705.329 | 111 |
| -705.222 | 34  | -705.349 | 50  | -704.218 | 12  | -704.124 | 211 |
| -705.222 | 38  | -705.349 | 88  | -704.141 | 182 |          |     |
| -705.207 | 126 | -705.34  | 164 | -704.128 | 244 |          |     |

**Table S3.** DFT energy of various intermediates on active sites

| Vacuum                                                      |           |           |           |           |           |
|-------------------------------------------------------------|-----------|-----------|-----------|-----------|-----------|
| Active Sites                                                | Slab (eV) | *OH (eV)  | *O (eV)   | *OOH (eV) | *H (eV)   |
| Co                                                          | -867.259  | -878.837  | -874.447  | -883.265  | -871.639  |
| Cu                                                          | -867.259  | -878.046  | -872.515  | -882.976  | -871.026  |
| Fe                                                          | -867.259  | -879.136  | -876.209  | -883.679  | -872.227  |
| Ni                                                          | -867.259  | -878.626  | -873.499  | -882.975  | -871.605  |
| Pt                                                          | -867.259  | -878.380  | -873.593  | -882.788  | -871.960  |
| Implicit Solvation ( $E_{\text{sol}} = 0.1 \text{ eV}$ )    |           |           |           |           |           |
| Active Sites                                                | Slab (eV) | *OH (eV)  | *O (eV)   | *OOH (eV) | *H (eV)   |
| Cu                                                          | -867.359  | -877.991  | -872.561  | -883.114  | -870.967  |
| Pt                                                          | -867.359  | -878.419  | -873.627  | -882.867  | --        |
| Explicit Solvation ( $E_{\text{sol}} = 273.86 \text{ eV}$ ) |           |           |           |           |           |
| Active Sites                                                | Slab (eV) | *OH (eV)  | *O (eV)   | *OOH (eV) | *H (eV)   |
| Cu                                                          | -1141.116 | -1151.764 | -1146.413 | -1156.488 | -1144.832 |
| Pt                                                          | -1141.163 | -1152.392 | -1147.836 | -1156.597 | --        |

**Table S4.** Oxygen adsorption on active sites of HEANs through end-on formats.

| Active Sites       | Slab (eV) | *O <sub>2</sub> (eV) | E <sub>ads</sub> (eV) | Magnetization of O <sub>2</sub> ( $\mu\mu$ ) | d <sub>o-o</sub> (Å) |
|--------------------|-----------|----------------------|-----------------------|----------------------------------------------|----------------------|
| O <sub>2</sub> (g) | --        | --                   | --                    | 1.68                                         | 1.233                |
| Co                 | -867.259  | -878.76              | -1.581                | 0.48                                         | 1.304                |
| Cu                 | -867.259  | -877.589             | -0.410                | 1.16                                         | 1.281                |
| Fe                 | -867.259  | -879.28              | -2.101                | 0.32                                         | 1.287                |
| Ni                 | -867.259  | -878.364             | -1.185                | 0.82                                         | 1.295                |
| Pt                 | -867.259  | -878.244             | -1.065                | 0.84                                         | 1.289                |

**Table S5.** The correction of Zero-point vibration and entropy to the Gibbs free energy of intermediates.

| Model               | ZPE (eV) | T*S (eV) | ZPE-T*S (eV) |
|---------------------|----------|----------|--------------|
| *OH                 | 0.34     | 0        | 0.34         |
| *O                  | 0.07     | 0        | 0.07         |
| *OOH                | 0.44     | 0        | 0.44         |
| H <sub>2</sub> (g)  | 0.27     | 0.4      | -0.13        |
| H <sub>2</sub> O(l) | 0.57     | 0.67     | -0.1         |
| O <sub>2</sub> (g)  | -9.92    | 0        | 0            |

**Table S6.** ICP-MS results of the electrolyte before/after the ORR, OER and HER test with HEAN/CNT loading on 1 cm<sup>2</sup> carbon cloth as the working electrode\*.

|                | <b>Ni<br/>ppm</b> | <b>Co<br/>ppm</b> | <b>Cu<br/>ppm</b> | <b>Pt<br/>ppm</b> | <b>Fe<br/>ppm</b> |
|----------------|-------------------|-------------------|-------------------|-------------------|-------------------|
| Before test    | 0.000864          | 0.000355          | 0.001050          | 0.005944          | 0.052342          |
| After test ORR | 0.000895          | 0.001725          | 0.013205          | 0.016833          | 0.041610          |
| After test OER | 0.000932          | 0.000660          | 0.014099          | 0.009875          | 0.060230          |
| After test HER | 0.001184          | 0.001327          | 0.004006          | 0.001616          | 0.037781          |

\*The lowest concentration of a substance that can be reliably reported by ICP-MS.

Each electrode was used for the ORR, OER and HER test up to 3000 cycles, thus the post-test electrolyte was obtained.

**Table S7.** the ECSA, specific and mass activity towards ORR at 0.9V vs. RHE with 1600rpm at a sweep rate of 10 mV s<sup>-1</sup>.

|                             | <b>ECSA (cm<sup>2</sup>)</b> | <b>MA (mA cm<sup>-2</sup> mg<sup>-1</sup>)</b> | <b>SA (mA cm<sup>-2</sup>)</b> |
|-----------------------------|------------------------------|------------------------------------------------|--------------------------------|
| HEAN/CNT                    | 42.5                         | 2                                              | 0.047                          |
| 20%Pt/C                     | 210                          | 13.4                                           | 0.063                          |
| HEAN/CNT<br>after<br>5000CV | 42.5                         | 2                                              | 0.047                          |
| 20%Pt/C<br>after<br>5000CV  | 210                          | 6.4                                            | 0.030                          |

**Table S8.** the activity normalized by noble metal mass towards OER and HER with 1600rpm at a sweep rate of 10 mV s<sup>-1</sup>.

|          | <b>OER of j@1.6V(cm<sup>2</sup>)</b>                      | <b>HER of j@-0.04V</b>                                    |
|----------|-----------------------------------------------------------|-----------------------------------------------------------|
| HEAN/CNT | 3290(mA cm <sup>-2</sup> mg <sub>pt</sub> <sup>-1</sup> ) | 3733(mA cm <sup>-2</sup> mg <sub>pt</sub> <sup>-1</sup> ) |
| 20%Pt/C  | 253(mA cm <sup>-2</sup> mg <sub>Ru</sub> <sup>-1</sup> )  | 1067(mA cm <sup>-2</sup> mg <sub>pt</sub> <sup>-1</sup> ) |

**Table S9.** Comparison of the trifunctional ORR/OER/HER electrocatalytic performances of the HEAs with previously reported advanced catalysts.

| <b>Catalysts</b>              | <b>ORR<sub>Eonset</sub></b><br><b>(V vs. RHE)</b> | <b>OER<sub>E=10</sub></b><br><b>(V vs. RHE)</b> | <b>HER<sub>E=10</sub></b><br><b>(V vs. RHE)</b> | <b>Ref.</b>                                                   |
|-------------------------------|---------------------------------------------------|-------------------------------------------------|-------------------------------------------------|---------------------------------------------------------------|
| HEAN                          | 0.913                                             | 1.606                                           | -0.035                                          | This work                                                     |
| 20%Pt/C                       | 0.997                                             | --                                              | -0.031                                          | This work                                                     |
| RuO <sub>2</sub>              | --                                                | 1.593                                           | --                                              | This work                                                     |
| HEAN after 5000CV             | 0.908                                             | 1.601                                           | -0.034                                          | This work                                                     |
| 20%Pt/C after<br>5000CV       | 0.944                                             | --                                              | -0.061                                          | This work                                                     |
| RuO <sub>2</sub> after 5000CV | --                                                | 1.598                                           | --                                              | This work                                                     |
| HESAC                         | 0.999                                             | --                                              | --                                              | <i>Nat. Commun.</i><br><b>2022</b> , 13, 5071 <sup>[10]</sup> |
| Co-N-CTS                      | 0.96                                              | 1.51                                            | --                                              | <i>Nat. Commun.</i><br><b>2023</b> , 14, 2294 <sup>[11]</sup> |
| FeNiCoCrMn-G                  | --                                                | 1.459                                           | -0.21                                           | <i>Adv. Sci.</i> <b>2021</b> , 8,<br>2002446 <sup>[12]</sup>  |
| Ru1Ni1-NCNFs                  | --                                                | 1.52                                            | -0.035                                          | <i>Adv. Sci.</i> <b>2020</b> , 7,<br>1901833 <sup>[13]</sup>  |
| FeCoNiMnRu/CNFs               | --                                                | 1.375                                           | -0.005                                          | <i>Nat. Commun.</i><br><b>2023</b> , 14, 2294 <sup>[14]</sup> |
| HEA-NPs-(14)                  | 0.92                                              | --                                              | -0.018                                          | <i>Adv. Mater.</i> <sup>[15]</sup> .                          |

## Appendix

POSCAR179\1\1\1

1.000000000000000

15.125000000000000 0.000000000000000 0.000000000000000

-7.557104270600000 13.144328568300006 0.000000000000000

0.0000000000000013 0.0000000000000023 21.341999053999986

Pt Co Cu Ni Fe

26 26 30 30 32

Selective dynamics

Direct

|                    |                    |                    |   |   |   |
|--------------------|--------------------|--------------------|---|---|---|
| 0.3316000100000025 | 0.6697800159999971 | 0.3550899999999970 | F | F | F |
| 0.9974696142598509 | 0.0032738969877585 | 0.6480948992585941 | T | T | T |
| 0.2743024356284560 | 0.5541232759423088 | 0.5450500025503628 | T | T | T |
| 0.2721901393564199 | 0.7221676007001649 | 0.5472089702233960 | T | T | T |
| 0.3338699939999970 | 0.1636999990000021 | 0.3514899999999983 | F | F | F |
| 0.9978178471955046 | 0.4955426108949886 | 0.6435593176494544 | T | T | T |
| 0.1078306053027787 | 0.8801150370172451 | 0.5423470283553126 | T | T | T |
| 0.3324899970000033 | 0.4941099879999982 | 0.3557699999999997 | F | F | F |
| 0.9993349417589792 | 0.8285380760372300 | 0.6474785432018952 | T | T | T |
| 0.1064880433262544 | 0.0596005104025181 | 0.5424370846812926 | T | T | T |
| 0.2758684866336824 | 0.0552013814133086 | 0.5454817403838738 | T | T | T |
| 0.4522704979961007 | 0.5569410825307883 | 0.5472259628056994 | T | T | T |
| 0.6686499710000007 | 0.1701499970000029 | 0.3588099999999983 | F | F | F |
| 0.3281511341500304 | 0.5034854581282232 | 0.6548120463770910 | T | T | T |
| 0.6681500079999978 | 0.9941599969999970 | 0.3534099999999967 | F | F | F |
| 0.3295826151548015 | 0.3274685601675354 | 0.6443059530355011 | T | T | T |
| 0.4530211954415915 | 0.8892984391862018 | 0.5459666736610584 | T | T | T |
| 0.5604299900000029 | 0.2782199979999973 | 0.4458599980000031 | F | F | F |
| 0.4512225675208906 | 0.0588245627749456 | 0.5482648179252761 | T | T | T |
| 0.6194794084384783 | 0.3967327759592523 | 0.5483420546338663 | T | T | T |
| 0.4439891870266924 | 0.2289746717424890 | 0.5492222257229111 | T | T | T |
| 0.0004700000000000 | 0.3320699929999975 | 0.3563199999999966 | F | F | F |
| 0.6631353503032275 | 0.6644623090710369 | 0.6470876453393635 | T | T | T |
| 0.0553699989999998 | 0.6102799769999976 | 0.4486500020000008 | F | F | F |
| 0.7778017034185304 | 0.2204599466610107 | 0.5444736225617024 | T | T | T |
| 0.8913199899999995 | 0.7771499750000004 | 0.4501899999999992 | F | F | F |
| 0.2175700069999991 | 0.6080800289999999 | 0.4489500000000035 | F | F | F |
| 0.2196400019999984 | 0.4389899970000002 | 0.4497300009999989 | F | F | F |
| 0.5047500129999989 | 0.8354700209999990 | 0.3524999999999991 | F | F | F |
| 0.1711340349665348 | 0.1647827734293418 | 0.6396085865919531 | T | T | T |
| 0.2215400039999977 | 0.7834500069999990 | 0.4491000020000016 | F | F | F |
| 0.1040440868873021 | 0.7140373347427426 | 0.5478963560594767 | T | T | T |
| 0.3349199889999994 | 0.9996200200000018 | 0.3545900000000017 | F | F | F |

|                    |                     |                    |   |   |   |
|--------------------|---------------------|--------------------|---|---|---|
| 0.9977194202743768 | 0.3341254293669413  | 0.6377987555143128 | T | T | T |
| 0.4529313350818412 | 0.7262887803272018  | 0.5502274528788937 | T | T | T |
| 0.6189815095170978 | 0.8906452553657971  | 0.5464264942020871 | T | T | T |
| 0.5588300229999987 | 0.9449300169999972  | 0.4482000020000001 | F | F | F |
| 0.7203099729999991 | 0.9428399800000022  | 0.4527499969999980 | F | F | F |
| 0.7270200250000016 | 0.1083799970000001  | 0.4523700029999986 | F | F | F |
| 0.7276499869999995 | 0.4485200049999989  | 0.4480200040000000 | F | F | F |
| 0.6164548706009512 | 0.2278000747750478  | 0.5496739067951424 | T | T | T |
| 0.7231900100000033 | 0.6093299979999998  | 0.4468500019999979 | F | F | F |
| 0.7238799929999971 | 0.7785900240000032  | 0.4463000000000008 | F | F | F |
| 0.4420631246220231 | 0.3892591886090953  | 0.5443532510562326 | T | T | T |
| 0.9969099759999978 | 0.4993599949999989  | 0.3531100000000009 | F | F | F |
| 0.6597165747095004 | 0.8332126391016391  | 0.6386813791939956 | T | T | T |
| 0.0550299989999985 | 0.4442299899999966  | 0.4537699970000020 | F | F | F |
| 0.8849700089999999 | 0.6086099739999966  | 0.4511699970000009 | F | F | F |
| 0.8869699839999967 | 0.4440500139999983  | 0.4524599980000019 | F | F | F |
| 0.1689999999999969 | 0.9976999759999998  | 0.3540100000000024 | F | F | F |
| 0.8336101956169237 | 0.3358100674969903  | 0.6374937605316390 | T | T | T |
| 0.0622700010000017 | 0.9489399790000022  | 0.4463300029999999 | F | F | F |
| 0.3958899969999976 | 0.6166499850000022  | 0.4505899990000017 | F | F | F |
| 0.3929100040000009 | 0.7807899709999973  | 0.4493900009999976 | F | F | F |
| 0.1067097832048230 | 0.3839731692522347  | 0.5445472654943492 | T | T | T |
| 0.2756292273571632 | 0.3870755349074088  | 0.5439773657626839 | T | T | T |
| 0.3348299860000026 | 0.8377599720000006  | 0.3540300000000016 | F | F | F |
| 0.0013079499221310 | 0.1724046923540260  | 0.6460821663312192 | T | T | T |
| 0.5011900069999982 | 0.3369199930000022  | 0.3537400000000019 | F | F | F |
| 0.1706243767051447 | 0.6659027784977696  | 0.6500154885758235 | T | T | T |
| 0.3343400059999979 | 0.3305799959999973  | 0.3541700000000034 | F | F | F |
| 0.0018828440045268 | 0.6639943284997711  | 0.6476864059677906 | T | T | T |
| 0.6182409657513332 | 0.7270873924020548  | 0.5427663704440483 | T | T | T |
| 0.8392000199999998 | 0.1639100020000015  | 0.3551300000000026 | F | F | F |
| 0.5009746443382320 | 0.4964902947719556  | 0.6513246287385426 | T | T | T |
| 0.5591199990000035 | 0.1089800000000025  | 0.4529799969999999 | F | F | F |
| 0.6193692813746398 | 0.5609785227756485  | 0.5448354900878369 | T | T | T |
| 0.7805291930882619 | 0.8876361752277439  | 0.5459211708580717 | T | T | T |
| 0.1638099999999980 | 0.5009199980000005  | 0.3543999999999983 | F | F | F |
| 0.8287860223172913 | 0.8345221206549869  | 0.6487921767711067 | T | T | T |
| 0.0569799989999993 | 0.2774499949999978  | 0.4530299970000016 | F | F | F |
| 0.8907899860000015 | 0.1135599990000031  | 0.4508400039999998 | F | F | F |
| 0.9389792736155914 | 0.0568086219391212  | 0.5457157701337237 | T | T | T |
| 0.9461087557830349 | 0.2211690986334627  | 0.5463334547330080 | T | T | T |
| 0.9985200169999970 | 0.6682900189999970  | 0.3519300000000030 | F | F | F |
| 0.6627556985672906 | -0.0000137056905531 | 0.6472345685431480 | T | T | T |
| 0.0008199999999974 | 0.8335499760000005  | 0.3528500000000037 | F | F | F |

|                    |                     |                    |   |   |   |
|--------------------|---------------------|--------------------|---|---|---|
| 0.6631381369064898 | 0.1652634614004513  | 0.6487438636439425 | T | T | T |
| 0.7821338783767650 | 0.7226717466184654  | 0.5492871873678483 | T | T | T |
| 0.1682399959999969 | 0.3275899890000034  | 0.3531300000000002 | F | F | F |
| 0.8335492279010961 | 0.6608637690402780  | 0.6456170581030481 | T | T | T |
| 0.8926399950000032 | 0.9482100009999996  | 0.4502300019999979 | F | F | F |
| 0.1133026972918935 | 0.2263968664423597  | 0.5485419155185088 | T | T | T |
| 0.2781121911478401 | 0.8874027495369748  | 0.5450342154366384 | T | T | T |
| 0.3889200090000031 | 0.9448000189999988  | 0.4480500000000021 | F | F | F |
| 0.3889200090000031 | 0.1075799990000021  | 0.4471699970000031 | F | F | F |
| 0.5102999810000028 | 0.5042600040000025  | 0.3545999999999978 | F | F | F |
| 0.1760734950477186 | 0.8362561496757535  | 0.6426850558076892 | T | T | T |
| 0.5072799920000008 | 0.6711699960000033  | 0.3567999999999998 | F | F | F |
| 0.1736863562316128 | 0.0036826989971862  | 0.6490477480966338 | T | T | T |
| 0.3861699999999999 | 0.2790600060000017  | 0.4504600019999998 | F | F | F |
| 0.3901500110000029 | 0.4410200120000027  | 0.4505499970000031 | F | F | F |
| 0.2215999960000019 | 0.1112700030000013  | 0.4464600009999984 | F | F | F |
| 0.5611799959999999 | 0.7827799920000018  | 0.4504999959999978 | F | F | F |
| 0.8379799719999994 | 0.5012099739999982  | 0.3562999999999974 | F | F | F |
| 0.5000236842564888 | 0.8350750319234547  | 0.6453993733246797 | T | T | T |
| 0.6173634649342022 | 0.0543946160027109  | 0.5482507158093756 | T | T | T |
| 0.5630599859999990 | 0.6144999859999984  | 0.4475900010000018 | F | F | F |
| 0.5588399769999981 | 0.4488700030000032  | 0.4489800030000026 | F | F | F |
| 0.8405600190000015 | 0.0014200000000031  | 0.3575999999999979 | F | F | F |
| 0.5068053963430380 | 0.3363795279011839  | 0.6476820717890047 | T | T | T |
| 0.1645199949999991 | 0.6702100039999976  | 0.3514199999999974 | F | F | F |
| 0.8250192661220676 | -0.0014705088650812 | 0.6401286275327662 | T | T | T |
| 0.0586199979999975 | 0.7782099840000001  | 0.4467500000000015 | F | F | F |
| 0.1696799990000031 | 0.8337000009999969  | 0.3537200000000027 | F | F | F |
| 0.8329163841085282 | 0.1653852128994819  | 0.6411851216276453 | T | T | T |
| 0.9423921237554268 | 0.8866448205841344  | 0.5477568335625635 | T | T | T |
| 0.7852012700102498 | 0.5588806558143298  | 0.5452992535155238 | T | T | T |
| 0.1666299999999978 | 0.1642699989999983  | 0.3517000000000010 | F | F | F |
| 0.8282910470880458 | 0.4950072095011696  | 0.6398198683276106 | T | T | T |
| 0.0060799999999972 | 0.9999399780000005  | 0.3549500000000023 | F | F | F |
| 0.6692263322495772 | 0.3324896579061563  | 0.6437997487322447 | T | T | T |
| 0.4986000059999967 | 0.0003799999999998  | 0.3572100000000020 | F | F | F |
| 0.1650312122548274 | 0.3376998751609370  | 0.6409582434081549 | T | T | T |
| 0.1037483394936662 | 0.5499072588789942  | 0.5459353940868286 | T | T | T |
| 0.4968200030000034 | 0.1589699980000034  | 0.3521900000000002 | F | F | F |
| 0.1579234594856038 | 0.4884847357282595  | 0.6381710067101539 | T | T | T |
| 0.2234500049999966 | 0.9431999919999967  | 0.4444300010000006 | F | F | F |
| 0.2199900000000028 | 0.2723099890000000  | 0.4533099980000017 | F | F | F |
| 0.2758110399973612 | 0.2268205414191925  | 0.5422973908203896 | T | T | T |
| 0.8352500199999966 | 0.3419899940000022  | 0.3581100000000035 | F | F | F |

|                    |                     |                    |   |   |   |
|--------------------|---------------------|--------------------|---|---|---|
| 0.5011995765427959 | 0.6800304791003479  | 0.6396231538996976 | T | T | T |
| 0.6751400229999973 | 0.5051100250000005  | 0.3572699999999998 | F | F | F |
| 0.3406347302526551 | 0.8423549732851484  | 0.6414234041405263 | T | T | T |
| 0.8266800050000001 | 0.6627200249999987  | 0.3575599999999994 | F | F | F |
| 0.4891395700769358 | 0.9982187969440887  | 0.6440395371125874 | T | T | T |
| 0.6807900069999988 | 0.3432399929999974  | 0.3552800000000005 | F | F | F |
| 0.3461879184103683 | 0.6756688732747290  | 0.6405358867252983 | T | T | T |
| 0.7350400090000022 | 0.2913100119999967  | 0.4497399999999985 | F | F | F |
| 0.6736000180000019 | 0.6697400210000026  | 0.3585100000000025 | F | F | F |
| 0.3364027337269572 | -0.0014994257630148 | 0.6419686155030475 | T | T | T |
| 0.6718999739999987 | 0.8302800060000024  | 0.3593699999999984 | F | F | F |
| 0.3327918413020804 | 0.1616587987825028  | 0.6442932158017260 | T | T | T |
| 0.8296599979999968 | 0.8305000069999977  | 0.3552099999999996 | F | F | F |
| 0.4947342340963994 | 0.1627764080001075  | 0.6425105670484738 | T | T | T |
| 0.8871499899999975 | 0.2872700100000003  | 0.4504799990000024 | F | F | F |
| 0.7713185082808274 | 0.0492534245554822  | 0.5469611706445343 | T | T | T |
| 0.7863593407936236 | 0.3923635568492818  | 0.5437910186748114 | T | T | T |
| 0.9436677020097785 | 0.3922240136663086  | 0.5426625345190975 | T | T | T |
| 0.9419481585628224 | 0.5547145410328402  | 0.5438168561207971 | T | T | T |
| 0.9478899132669776 | 0.7126345554844623  | 0.5458100958188259 | T | T | T |
| 0.0081699999999998 | 0.1646000000000001  | 0.3576300000000003 | F | F | F |
| 0.6700153615289407 | 0.4991086337754980  | 0.6425228195242664 | T | T | T |
| 0.0636899989999975 | 0.1185199990000001  | 0.4431599970000022 | F | F | F |



## SI References

- [1] G. Kresse, J. Furthmüller, Efficiency of ab-initio total energy calculations for metals and semiconductors using a plane-wave basis set. *Computational Materials Science* **1996**, 6, 15.
- [2] G.Kresse, J. Furthmüller, Efficient iterative schemes for ab initio total-energy calculations using a plane- wave basis set. *Phys. Rev. B* **1996**, 54, 11169.
- [3] John P. Perdew, Kieron Burke, and Matthias Ernzerhof, Generalized Gradient Approximation Made Simple. *Phys. Rev. Lett.* **1996**, 77, 3865.
- [4] Egill Skulason, Vladimir Tripkovic, Márten Björketun, Sigridur Gudmundsdottir, Gustav Karlberg, Jan Rossmeisl, Thomas Bligaard, Hannes Jonsson, Jens Kehlet Nørskov, Modeling the Electrochemical Hydrogen Oxidation and Evolution Reactions on the Basis of Density Functional Theory Calculations. *The Journal of Physical Chemistry C* **2010**, 114, 18182.
- [5] Kiran Mathew; Ravishankar Sundararaman; Kendra Letchworth-Weaver; T. A. Arias; Richard G. Hennig, Implicit solvation model for density-functional study of nanocrystal surfaces and reaction Pathways. *J. Chem. Phys.* **2014**,140, 084106.
- [6] Youchao Kong, Shanshan Yan, Jinxian Feng, Shuangpeng Wang, Hui Pan, Design of phosphorus-functionalized MXenes for highly efficient hydrogen evolution reaction. *J. Mater. Chem. A*, **2021**, 9, 597-606
- [7] Yinghe Zhao, Haobo Li, Ruouo Yang, Shuxian Xie, Teng Liu, Pengyu Li, Youwen Liu, Huiqiao Li, Fa Yang, Tianyou Zhai, Transient phase transition during the hydrogen evolution reaction. *Energy Environ. Sci.* **2023**,16, 3951-3959.
- [8] Shah, A.H., Zhang, Z., Huang, Z. *et al.* The role of alkali metal cations and platinum-surface hydroxyl in the alkaline hydrogen evolution reaction. *Nature Catalysis* **2022**, 5, 923-933.
- [9] Liu, K., Fu, J., Lin, Y. *et al.* Insights into the activity of single-atom Fe-N-C catalysts for oxygen reduction reaction. *Nature Communications* **2022**, 13, 2075.
- [10] Rao, P., Deng, Y., Fan, W. *et al.* Movable type printing method to synthesize high-entropy single-atom catalysts. *Nat. Commun.* **2022**, 13, 5071.
- [11] Shi, W., Li, Z., Gong, Z. *et al.* Transient and general synthesis of high-density and ultrasmall nanoparticles on two-dimensional porous carbon via coordinated carbothermal shock. *Nat. Commun.* **2023**, 14, 2294.
- [12] T. X. Nguyen, Y.-H. Su, C.-C. Lin, J. Ruan, J.-M. Ting, A New High Entropy Glycerate for High Performance Oxygen Evolution Reaction. *Adv. Sci.* **2021**, 8, 2002446.
- [13] M. Li, H. Wang, W. Zhu, W. Li, C. Wang, X. Lu, RuNi Nanoparticles Embedded in N-Doped Carbon Nanofibers as a Robust Bifunctional Catalyst for Efficient Overall Water Splitting. *Adv. Sci.* **2020**, 7, 1901833.

[14] Hao, J., Zhuang, Z., Cao, K. *et al.* Unraveling the electronegativity-dominated intermediate adsorption on high-entropy alloy electrocatalysts. *Nat. Commun.* **2022**, 13, 2662.

[15] Wang Y, Luo W, Gong S, Luo L, Li Y, Zhao Y, Li Z. Synthesis of High-Entropy-Alloy Nanoparticles by a Step-Alloying Strategy as a Superior Multifunctional Electrocatalyst. *Adv. Mater.*, **2023**, e2302499.
